# Supplementary material
Source: PubMed Central journal article supplement (PMC1421344)
Supplement: JCI0625091sd.pdf [file JCI0625091sd.pdf]

*Supplementary methods. Identification of cortisol, androstenedione and testosterone by gas chromatography/mass spectrometry (GC/MS).*

Adrenal glands were cultured overnight in media. This media was collected and analyzed alongside a control (i.e. media unconditioned by adrenal glands) and three calibration samples (control media spiked with different amounts of testosterone, androstenedione and cortisol). An internal standard (400 ng of 17  $\alpha$ -methyltestosterone) was added to all samples. Samples were processed for analysis according to methodology described in Shackleton CH, *Profiling Steroid Hormones and Urinary Steroids (J Chromatogr 1986, 379, 91-156)* and Griffiths W, Shackleton CHL, Sjövall J, *Mass Spectrometry of Steroids (In: The Encyclopedia of Mass Spectrometry, Vol. 7, ed. Caprioli R, Elsevier: Amsterdam, 2005)*. Extracts were analyzed by a GC Top 8000 gas chromatograph coupled with a PolarisQ ion trap mass spectrometer and AI3000S autosampler (Finnigan MAT, San Jose, CA, USA). The steroids were separated on a DB-1 cross-linked methyl-silicone column (15 m x 0.25 mm i.d., film thickness 0.25  $\mu$ m; J&W Scientific, Folsom, CA, USA). Helium was used as a carrier gas at a constant pressure of ~35 kPa. A 3  $\mu$ l aliquot of the final derivatized extract was injected into the system operated in splitless mode (valve opened at 2 min). The GC temperature was ramped as follows: initial 50°C, held for 3 min, increased to 230°C at 30°C min<sup>-1</sup>, thereafter increased to 285°C at 2°C min<sup>-1</sup>. The injector and transfer line were kept at 260°C and 280°C, respectively. The ion source temperature was 225°C. Under these GC conditions, the retention times for androstenedione, testosterone, 17 $\alpha$ -methyltestosterone and cortisol were: 14.0, 14.3, 15.6 and 25.3 min, respectively.

**A**

Cortisol

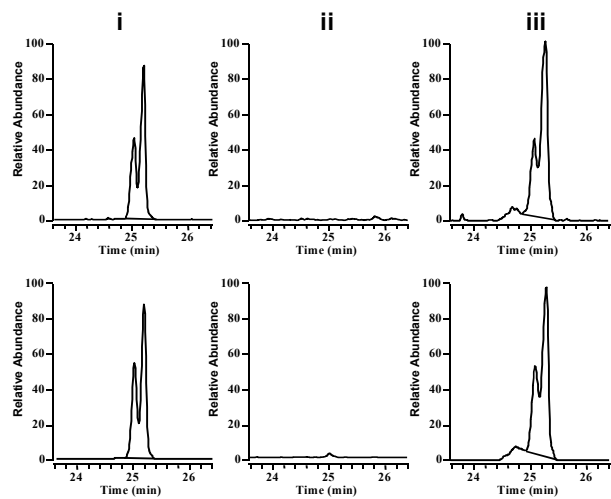**B**

Androstenedione

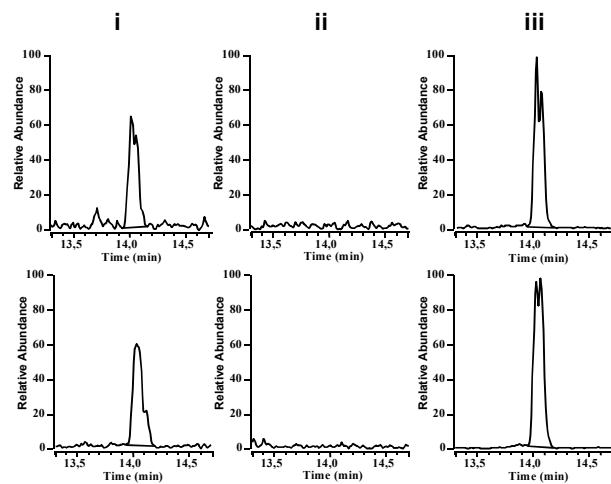**C**

Testosterone

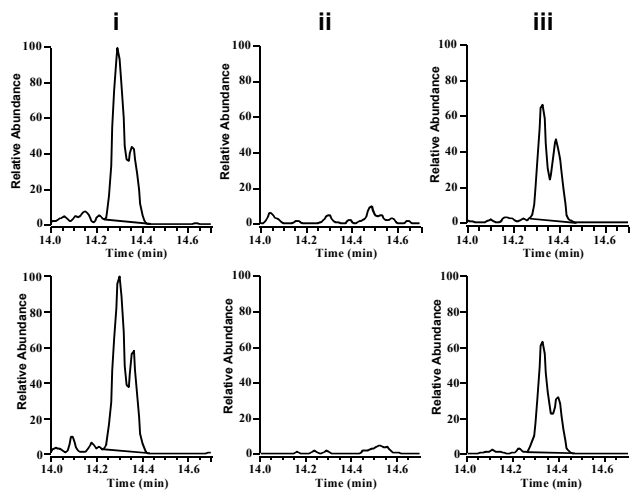

StAR

HSD3B2

CYP11A

Before  
culture

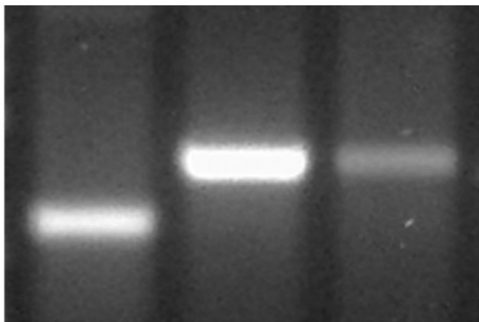

After  
culture

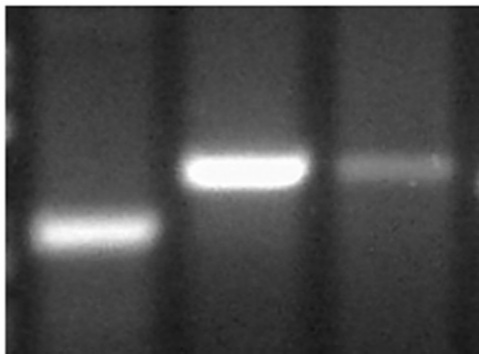

*Supplementary figure 1. GC/MS spectra for (A) cortisol, (B) androstenedione and (C) testosterone.*

In A-C, chromatographs are shown for (i) calibration samples, (ii) control media and (iii) adrenal media. There was no detection in the control media. To facilitate comparison between the different samples, the same scale has been used. **A.** Cortisol. Upper chromatograms, molecular ion  $m/z$  636; lower,  $m/z$  605. **B.** Androstenedione. Upper chromatograms, molecular ion  $m/z$  344; lower,  $m/z$  313. **C.** Testosterone (precursor ion;  $m/z$  389). Upper chromatograms, product ion  $m/z$  358; lower, product ion  $m/z$  268.

*Supplementary figure 2. HSD3B2 is not induced by culture.*

Reverse transcription followed by 24 cycles of PCR on total RNA isolated from human adrenal gland (8 wpc) before and after culture for 24 h. HSD3B2 is not increased by culture.

| Gene                      | Forward primer           | Reverse primer           | Product (bp) | Annealing temperature (°C) |
|---------------------------|--------------------------|--------------------------|--------------|----------------------------|
| <i>StAR</i>               | GTGGGGCCCCGTGACTTTGTGA   | CGCTTGCGCAGGTGGTTGG      | 287          | 61.5                       |
| <i>CYP11A</i>             | CCGCCCTGGGTCGCCTATCA     | GCATGGGGACGCTGGTGTGGA    | 373          | 61.2                       |
| <i>CYP17</i>              | GGCCACCCACAACGGACAGT     | CCACGCCAGCCCCAAAGATG     | 443          | 56.7                       |
| <i>HSD3B2</i>             | GAGACATTCTGGATGAGCC      | CGCACAAGTGTACAAGGTAT     | 370          | 54.9                       |
| <i>HSD3B1</i>             | GAGACATTCTGGATGAGCC      | GCACAAGTGTACAGGGTGC      | 370          | 54.9                       |
| <i>CYP21</i>              | GGCAGGCCAGTGGAGGGACAT    | TGGGGCAAGGCTAAGGGCACAA   | 348          | 62.5                       |
| <i>CYP11B1</i>            | TCGTGGCGGAGCTCCTGTTGAATG | CTGGGACCCTGGGTGCAGAGACGT | 672          | 63.2                       |
| <i>CYP11B2</i>            | CCGCCGCAGCCAGCATCAG      | GGGACCCTGGGTGCAGATGCAA   | 501          | 62.0                       |
| <i>ST</i>                 | CCCCATCCAGTTATTCCCCAAGTC | TTTTTCCAGTCCCCAGATACACCT | 468          | 54.7                       |
| <i>MC2R</i>               | GTGTGGTTTTTGCCGGAGGAGAT  | GTGGGCACATGATGGGAGAAGA   | 454          | 57.8                       |
| <i>HSD17B3</i>            | GCCGGACGCTGGAAAACTA      | CTCTTGCAGGGCCTTGAAAAAT   | 407          | 55.9                       |
| <i>HSD17B5/AKR1C3 (1)</i> | GTAAAGCTTTGGAGGTCAC      | CACCCATCGTTTGTCTCGT      |              |                            |
| <i>HSD17B5/AKR1C3 (2)</i> | CGAACTCCCCGGTGCTCTT      | TCTTTCTGGCCTATGGACTC     | 440          | 54.9                       |

Supplementary table 1. RT-PCR primers and conditions.

The data shown in Figure 8 is derived from the second set of AKR1C3 primers located in the 3' UTR but was also validated by using the additional primer pair listed above [AKR1C3 (1)] from Penning et al, *Biochemical J*, 351, 67-77, 2000.
